# Supplementary material for: Effects of Basal Defoliation on Wine Aromas: A Meta-Analysis
Source: PubMed Central journal article supplement (PMC6017958; doi:10.3390/molecules23040779), 2018-03-28
Supplement: molecules-23-00779-s001.pdf [file molecules-23-00779-s001.pdf]

# Effects of Basal Defoliation on Wine Aromas: A Meta-Analysis

## Supplementary Materials:

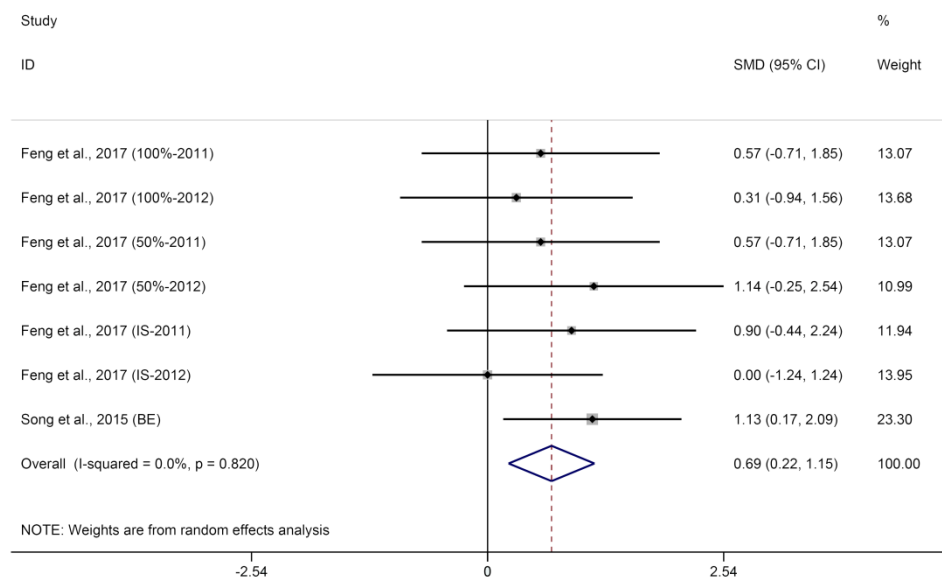

**Figure S1.** Meta-analysis for the effects of basal defoliation on  $\beta$ -ionone in wine.

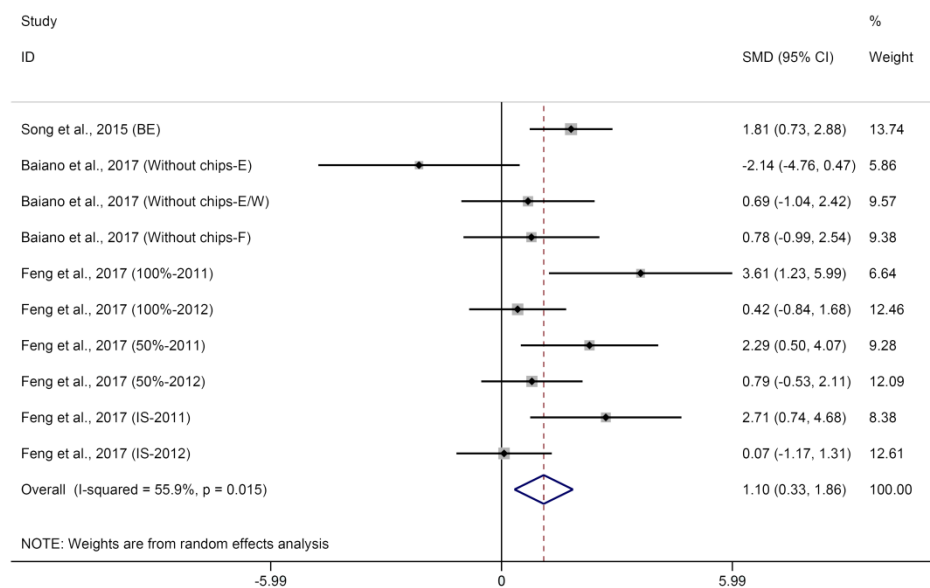

**Figure S2.** Meta-analysis for the effects of basal defoliation on geraniol in wine.

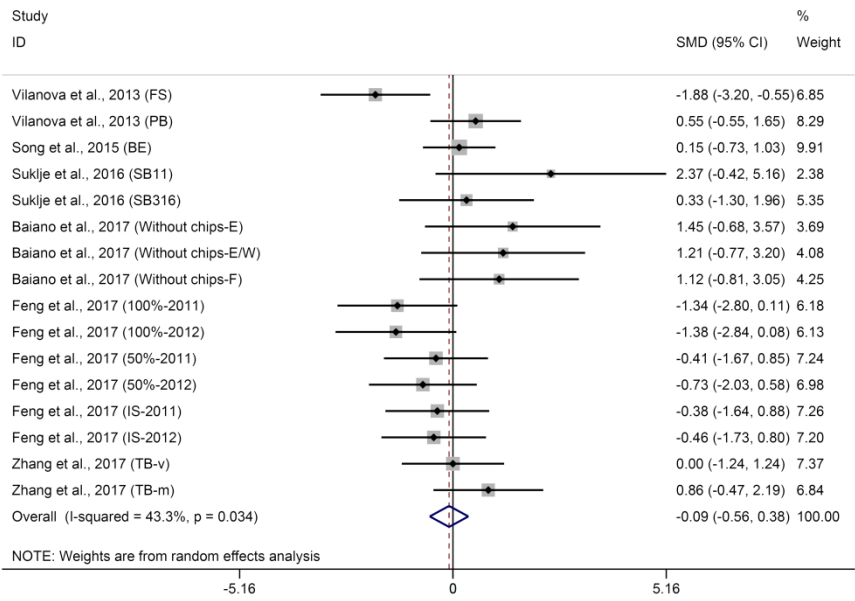

**Figure S3.** Meta-analysis for the effects of basal defoliation on hexyl acetate in wine.

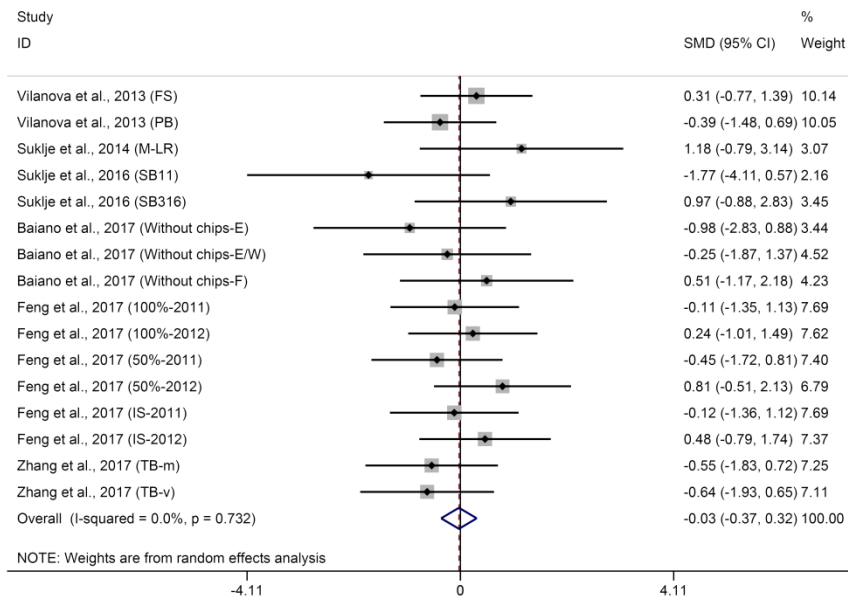

(a)

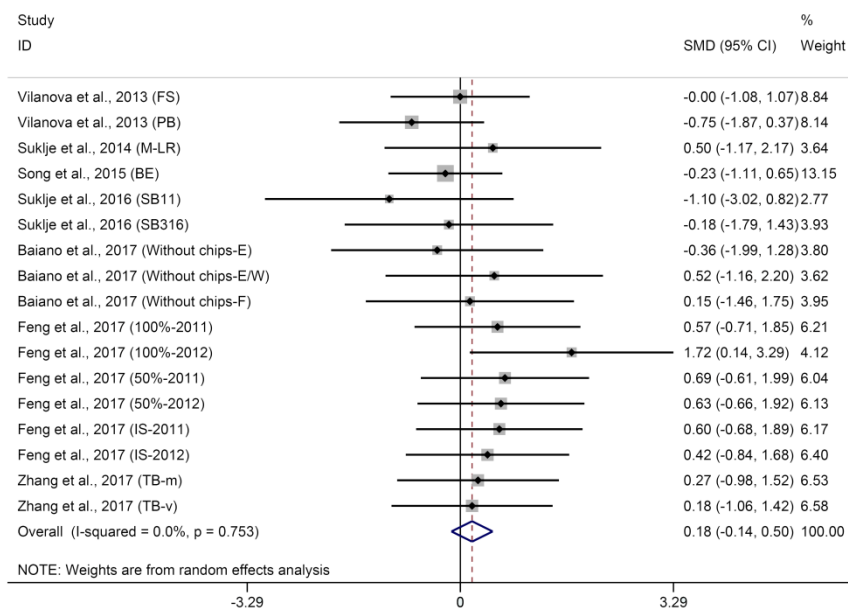

(b)

**Figure S4.** Meta-analysis for the effects of basal defoliation on (a) isobutanol and (b) isoamyl alcohol in wine.

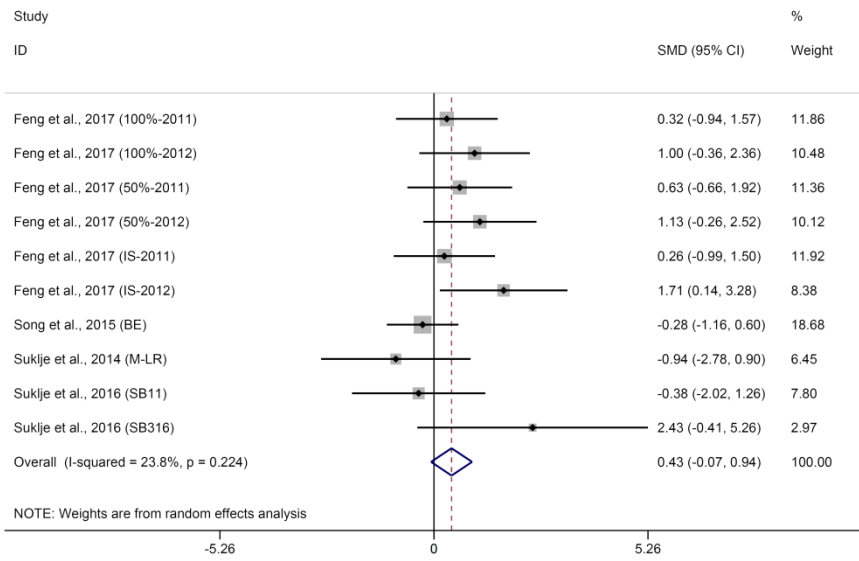

**Figure S5.** Meta-analysis for the effects of basal defoliation on isobutyl acetate in wine.

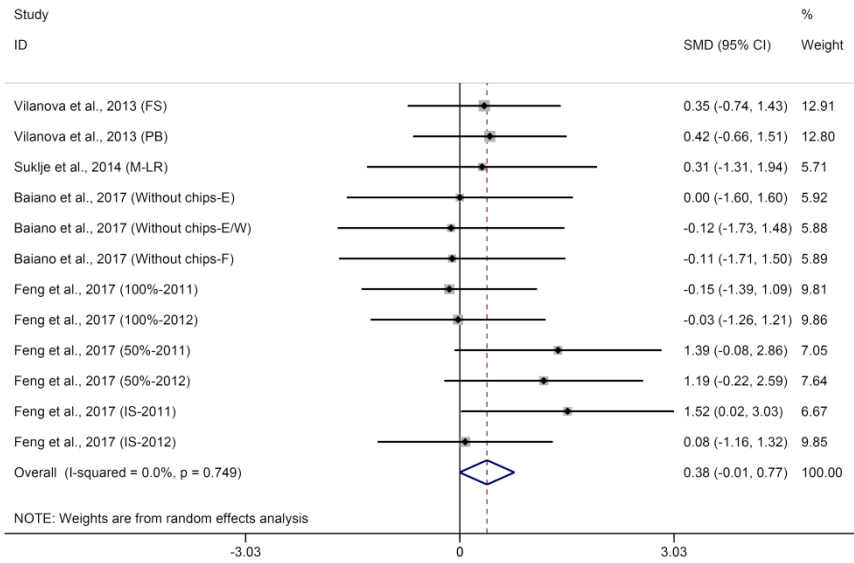

(a)

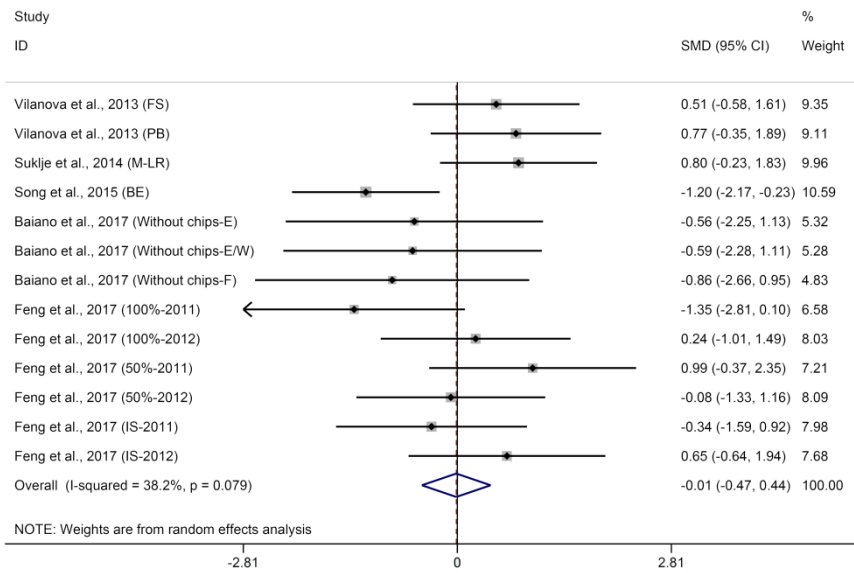

(b)

**Figure S6.** Meta-analysis for the effects of basal defoliation on (a) hexanoic acid and (b) octanoic acid in wine.

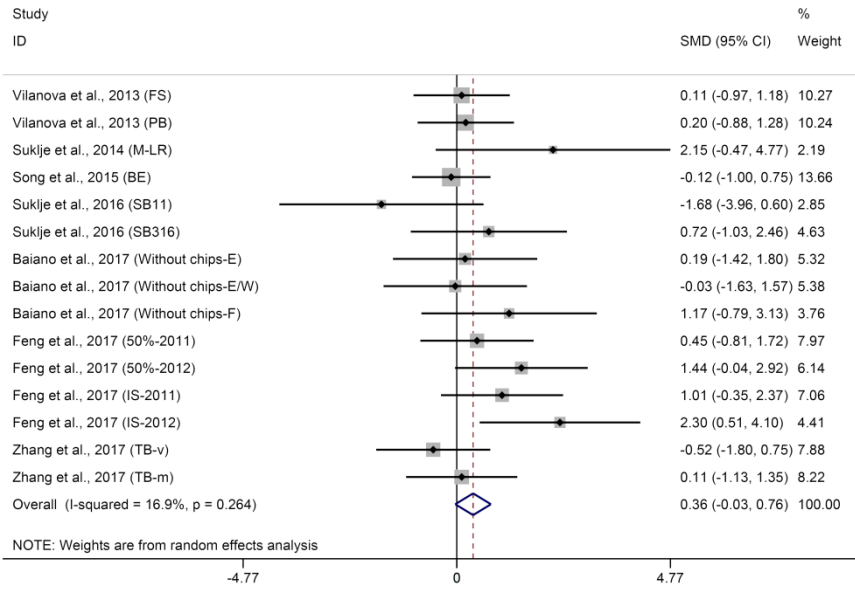

(a)

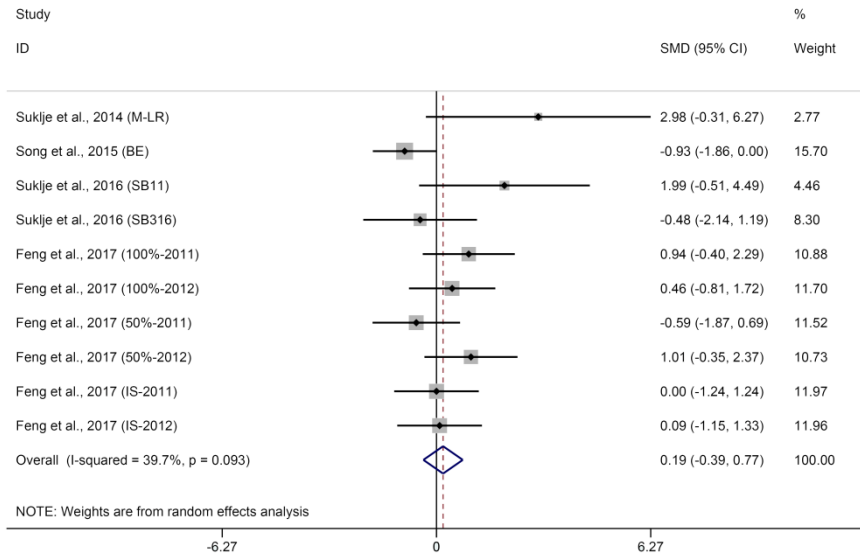

(b)

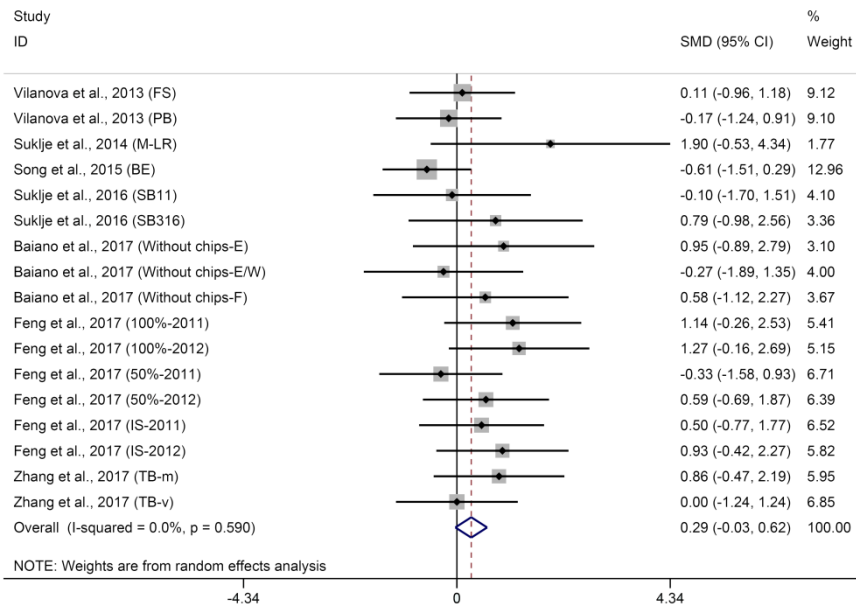

(c)

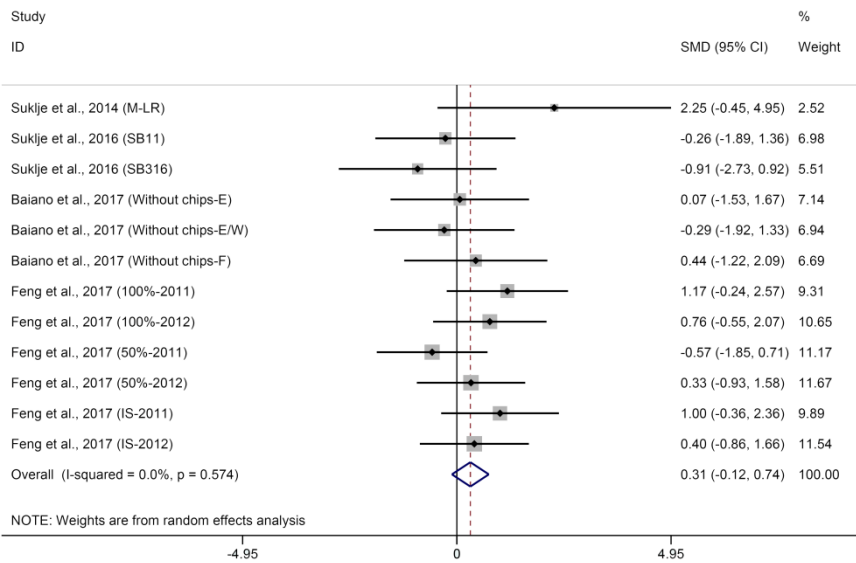

(d)

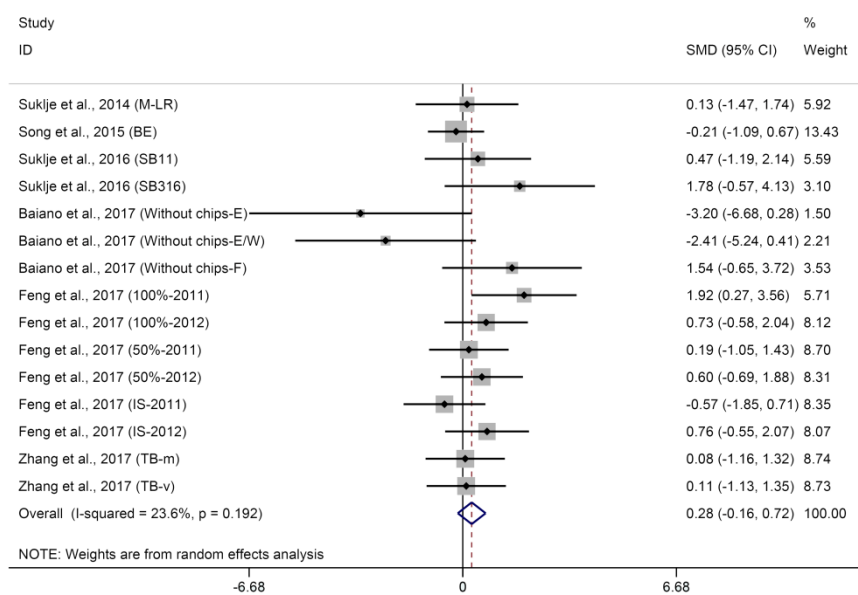

(e)

**Figure S7.** Meta-analysis for the effects of basal defoliation on (a) ethyl butyrate, (b) ethyl isobutyrate, (c) ethyl hexanoate, (d) ethyl isovalerate and (e) ethyl decanoate in wine.



**Table S1.** Characteristics of the nine studies included in the meta-analysis.

| <b>Author, publication year</b> | <b>Treatment ID</b> | <b>Replicates</b> | <b>Grape variety</b> | <b>MDf<sup>1</sup></b> | <b>BM<sup>2</sup></b> | <b>DT<sup>3</sup></b> | <b>DS<sup>4</sup></b> |
|---------------------------------|---------------------|-------------------|----------------------|------------------------|-----------------------|-----------------------|-----------------------|
| Kwasniewski et al., 2010        | 2days PBS           | 2                 | Riesling             | ns                     | low                   | pre-veraison          | 75%                   |
|                                 | 33days PBS          | 2                 | Riesling             | ns                     | low                   | pre-veraison          | 75%                   |
|                                 | 68days PBS          | 2                 | Riesling             | ns                     | low                   | pre-veraison          | 75%                   |
| Vilanova et al., 2012           | PB                  | 10                | Tempranillo          | higher                 | moderate              | pre-veraison          | 100%                  |
|                                 | FS                  | 10                | Tempranillo          | higher                 | moderate              | pre-veraison          | 100%                  |
| Suklje et al., 2014             | M-LR                | 3                 | Sauvignon Blanc      | higher                 | moderate              | pre-veraison          | 100%                  |
| Song et al., 2015               | BS                  | 10                | Pinot Noir           | higher                 | moderate              | veraison              | 100%                  |
| Sivilotti., 2016                | BF                  | 3                 | Merlot               | ns                     | low                   | pre-veraison          | 75%                   |
|                                 | AF                  | 3                 | Merlot               | ns                     | low                   | pre-veraison          | 75%                   |
| Suklje et al., 2016             | SB11                | 3                 | Sauvignon Blanc      | higher                 | low                   | pre-veraison          | 100%                  |
|                                 | SB316               | 3                 | Sauvignon Blanc      | ns                     | low                   | pre-veraison          | 100%                  |
| Baiano et al., 2017             | Without chips-E     | 3                 | Nero di Troia        | ns                     | low                   | veraison              | 75%                   |
|                                 | Without chips-E/W   | 3                 | Nero di Troia        | ns                     | low                   | veraison              | 75%                   |
|                                 | Without chips-F     | 3                 | Nero di Troia        | higher                 | low                   | veraison              | 100%                  |
| Feng et al., 2017               | 100%-2011           | 5                 | Pinot Noir           | ns                     | low                   | pre-veraison          | 100%                  |
|                                 | 50%-2011            | 5                 | Pinot Noir           | ns                     | low                   | pre-veraison          | 50%                   |
|                                 | IS-2011             | 5                 | Pinot Noir           | ns                     | low                   | pre-veraison          | 100%                  |

|                    |           |   |            |    |          |               |      |
|--------------------|-----------|---|------------|----|----------|---------------|------|
|                    | 100%-2012 | 5 | Pinot Noir | ns | high     | pre-veraison  | 100% |
|                    | 50%-2012  | 5 | Pinot Noir | ns | high     | pre-veraison  | 50%  |
|                    | IS-2013   | 5 | Pinot Noir | ns | high     | pre-veraison  | 100% |
| Zhang et al., 2017 | TB-v      | 5 | Shiraz     | ns | moderate | veraison      | 75%  |
|                    | TB-m      | 5 | Shiraz     | ns | low      | post-veraison | 75%  |

<sup>1</sup> difference of berry maturity between control and defoliation treatment; <sup>2</sup> berry maturity level; <sup>3</sup> timing of basal defoliation; <sup>4</sup> severity of basal defoliation.
